# Supplementary material
Source: ML conference proceedings conference paper supplement (https://openreview.net/forum?id=m5jmATYmsi)
Supplement: supplementary_material [file NeruIPS_2025_Supplementary_Material.pdf › supplementary material/NeruIPS_2025_Supplementary_Material.pdf]

---

# Topology-Aware Learning of Tubular Manifolds via SE(3)-Equivariant Network on Ball B-Spline Curve Supplementary Material

---

Anonymous Author(s)

Affiliation

Address

email

## Abstract

1        This section serves as the supplementary material to the full paper, providing  
2        additional details for the Circle of Willis (CoW) case study that is not fully covered  
3        in the main text. We present a brief analysis of several representative samples  
4        selected from the test set of SE(3)-BBSCformerGCN, focusing on cases where the  
5        model makes prediction errors and which exhibit notable topological heterogeneity.

## 6    A    Case Study

7    We conduct a case study on Circle of Willis (CoW) clinical data collected from a collaborating  
8    medical institution, focusing on samples where SE(3)-BBSCformerGCN makes prediction errors  
9    and which exhibit certain topological heterogeneity. As shown in Figure 1, the first row presents a  
10   complete CoW structure, a configuration that only accounts for about 20%–25% of real-world cases.  
11   In the remaining samples with topological variations, most commonly observed is the absence of the  
12   bilateral posterior communicating arteries (PcoA-L and PcoA-R), which connect the upper and lower  
13   parts of the CoW. In the fourth row, a more severe case of unilateral absence is observed.  
14   Beyond topology, geometric heterogeneity within the same type of branch also poses challenges.  
15   For instance, the MCA-L2 branch highlighted in green in the third row is noticeably longer than  
16   its counterparts in other samples, while the ICA-R1 branch in the fourth row, marked in ochre, is  
17   significantly thicker than in the other cases. Such variations in both topology and geometry contribute  
18   to the clinical difficulty of accurately classifying CoW branches.

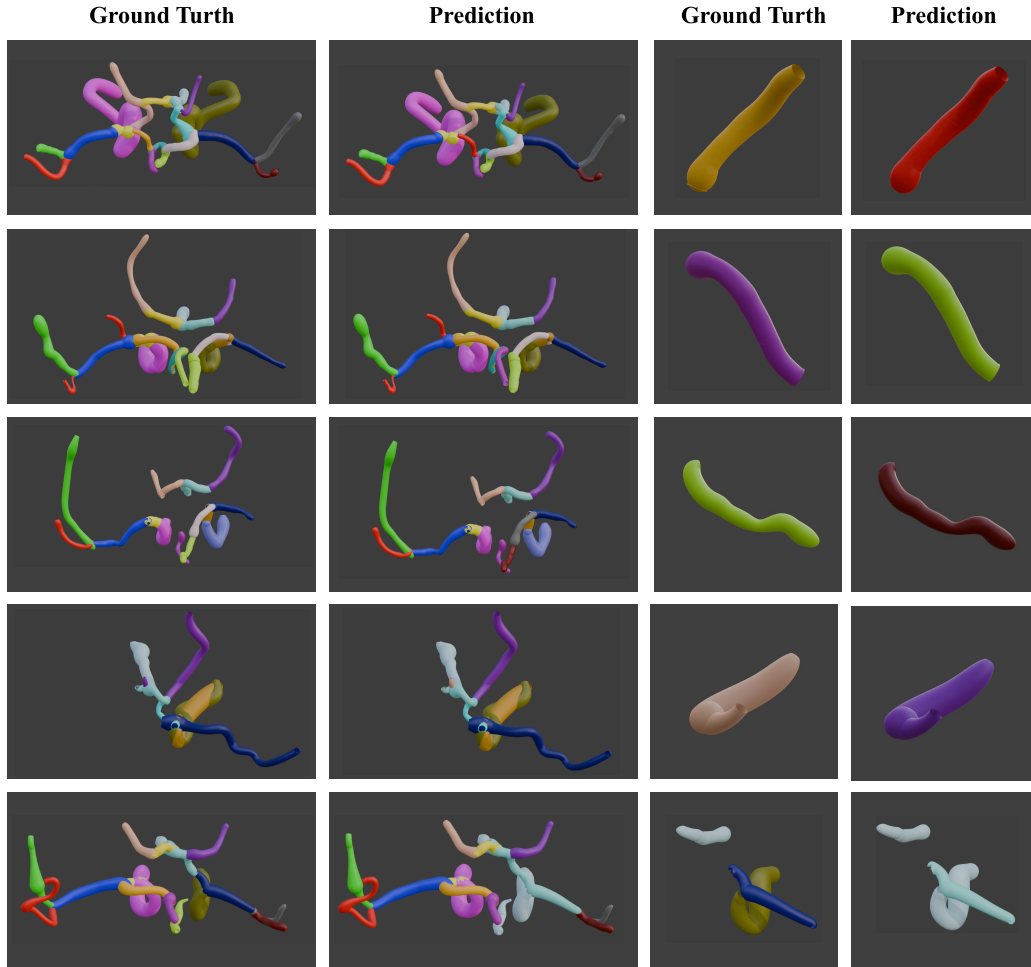

Figure 1: Clinical CoW samples with topological heterogeneity and the corresponding mispredicted structures by SE(3)-BBSCformerGCN. The first two columns show the complete CoW structures, while the last two columns highlight the misclassified branches.
